# Supplementary material
Source: publisher figshare collection journal article supplement (https://acs.figshare.com/ndownloader/files/3900577)
Supplement: Supplementary file 1 [file 3900577]

## Supporting Information

# Ligand-induced conformational change of *Plasmodium falciparum* AMA1 detected using $^{19}\text{F}$ NMR

Xiaopeng Ge<sup>1‡</sup>, Christopher A. MacRaid<sup>2‡</sup>, Shane M. Devine<sup>2</sup>, Cael O. Debono<sup>2</sup>, Geqing Wang<sup>2</sup>, Peter J. Scammells<sup>2</sup>, Martin J. Scanlon<sup>2</sup>, Robin F. Anders<sup>1</sup>, Michael Foley<sup>1\*</sup> and Raymond S. Norton<sup>2\*</sup>

<sup>1</sup> Department of Biochemistry, La Trobe University, Victoria 3086, Australia

<sup>2</sup> Medicinal Chemistry, Monash Institute of Pharmaceutical Sciences, Monash University,

381 Royal Parade, Parkville 3052, Australia

<sup>‡</sup> Equal contribution

\* Corresponding Authors

## Supporting Information:

Table SI

Figure S1

Figure S2

Figure S3

**Table SI** Line widths of 5F-Trp resonances in F367W AMA1 in the presence and absence of RON2L and R1.

|      | 5F-Trp F367W AMA1<br>(Hz) <sup>a</sup> | 5F-Trp F367W AMA1<br>+ RON2L (Hz) | 5F-Trp F367W AMA1<br>+ R1 (Hz) |
|------|----------------------------------------|-----------------------------------|--------------------------------|
| W399 | 114 ± 4                                | 132                               | 128                            |
| W110 | 110 ± 4                                | 98                                | 150                            |
| W315 | 96 ± 13                                | 89                                | 130                            |
| W298 | 102 ± 5                                | 128                               | 105                            |
| W367 | 250 ± 15                               | 104                               | 93                             |

a. Average line-width ± SEM from 5 independent samples

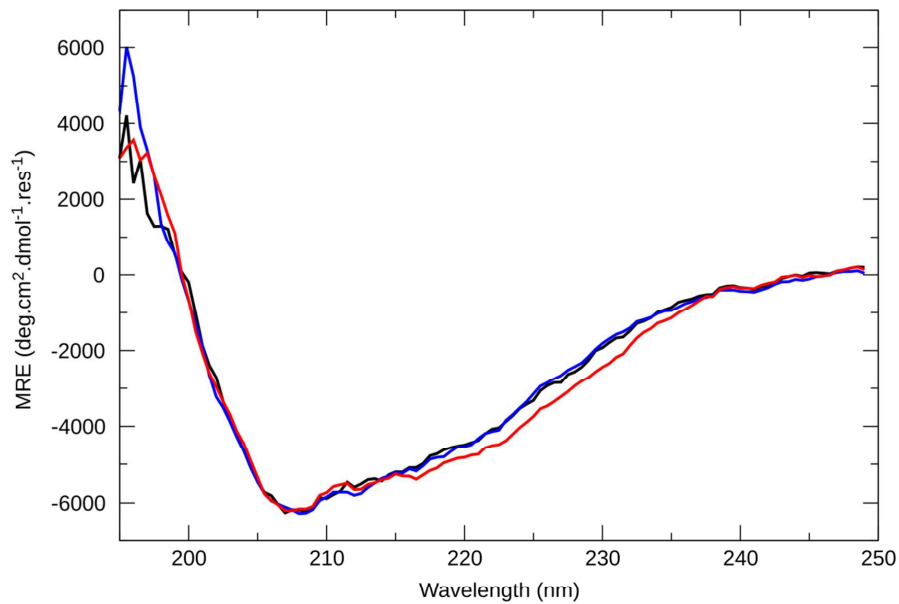

**Figure S1.** Circular dichroism spectra of 5F-Trp AMA1. Spectra for wild-type (black), F367W (blue) and IS373W (red) were recorded at 25°C and 0.2 mg/ml in 20 mM NaPO<sub>4</sub>, 100 mM NaCl, pH 7.4 on an Aviv Model 410SF spectrophotometer.

Formatted: Justified

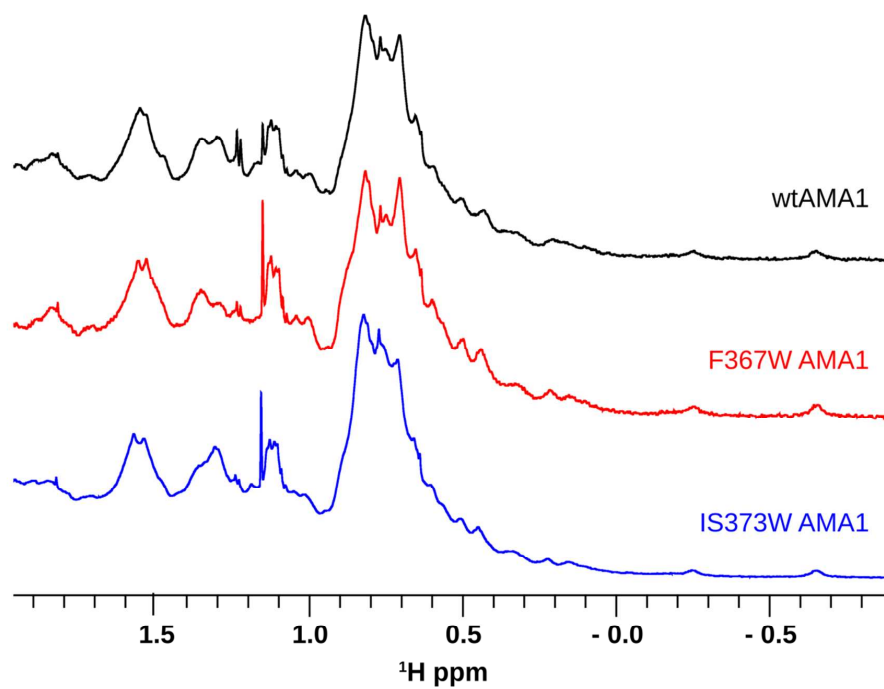

**Figure S2.** Upfield region of the  $^1\text{H}$  NMR spectra of wild-type AMA1 and its F367W and IS373W mutants, showing the well-dispersed methyl signals characteristic of correctly folded AMA1.

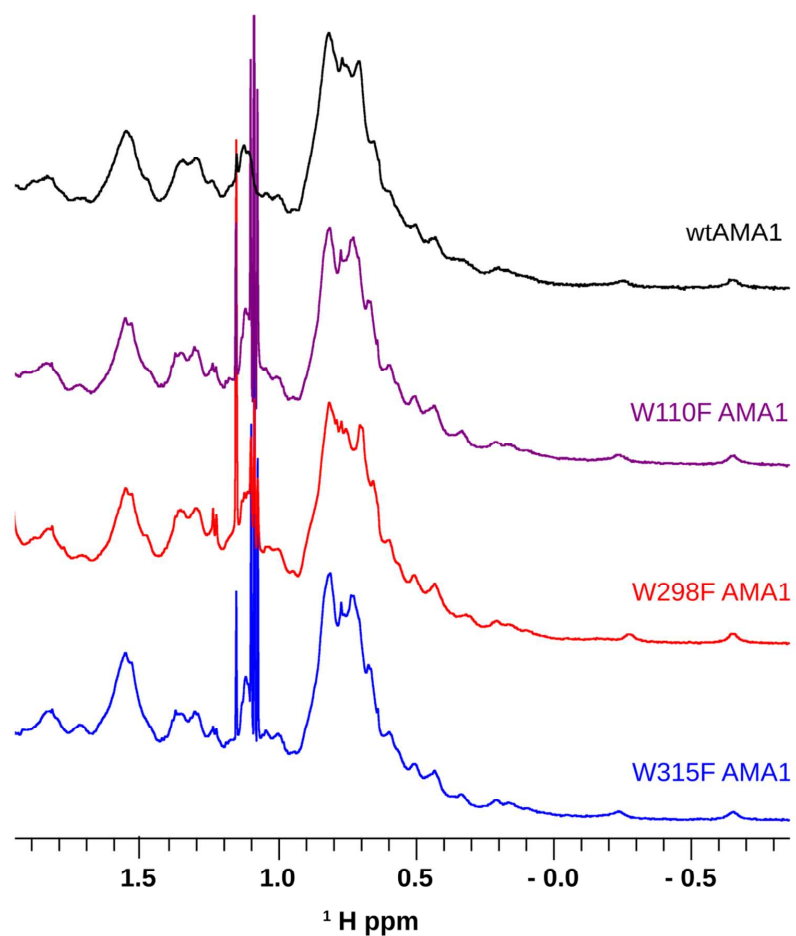

**Figure S3.** Upfield region of the  $^1\text{H}$  NMR spectra of wild-type AMA1 and Trp substitution mutants made to assign the 5F-Trp resonances in native AMA1. These spectra show the well-dispersed methyl signals characteristic of correctly folded AMA1.
